# Supplementary material for: In situsynchrotron X-ray diffraction study of coherently embedded silver nanostructure growth in silicon
Source: Royal Society of Chemistry journal article supplement (doi:10.1039/c7ce01441d), 2017-01-01
Supplement: c7ce01441d1.pdf [file c7ce01441d1.pdf]

## Supplementary Information

### In-situ Synchrotron X-ray Diffraction Study of Coherently Embedded Silver Nanostructures Growth in Silicon

Puspendu Guha,<sup>1,2,#</sup> Raghavendra Rao Juluri,<sup>1,3,#,\*</sup> Anjan Bhukta,<sup>1,4</sup> Arnab Ghosh,<sup>1,5</sup> Santanu Maiti,<sup>6,7</sup> Arpan Bhattacharyya,<sup>2,6</sup> Velaga Srihari<sup>8</sup> and Parlapalli V Satyam<sup>1,2,\*</sup>

<sup>1</sup>Institute of Physics, Sachivalaya Marg, Bhubaneswar - 751005, India.

<sup>2</sup>Homi Bhabha National Institute, Training School Complex, Anushakti Nagar, Mumbai - 400085, India.

<sup>3</sup>Interdisciplinary Nanoscience Center, Aarhus University, Aarhus, Denmark - 8000.

<sup>4</sup>International Centre for Materials Science, Jawaharlal Nehru Centre for Advanced Scientific Research, Jakkur, Bangalore-560064, India.

<sup>5</sup>Department of Physics, Indian Institute of Technology Kharagpur, Kharagpur - 721302, India.

<sup>6</sup>Saha Institute of Nuclear Physics, 1/AF, Bidhannagar, Kolkata - 700064, India.

<sup>7</sup>Institute of Applied Physics, University of Tübingen, Auf der Morgenstelle 10, Tübingen - 72076, Germany.

<sup>8</sup>High Pressure and Synchrotron Radiation Physics Division, Bhabha Atomic Research Centre, Trombay, Mumbai - 400085, India.

#These authors contributed equally to this work.

\***Email:** [pvsatyam22@gmail.com](mailto:pvsatyam22@gmail.com), [satyam@iopb.res.in](mailto:satyam@iopb.res.in), [raghavavaphy@gmail.com](mailto:raghavavaphy@gmail.com)

Tel.: +91-674-2306413 (Work), +91-943-755-8903 (Mobile), Fax: +91-674-2300142.

Figure S1:

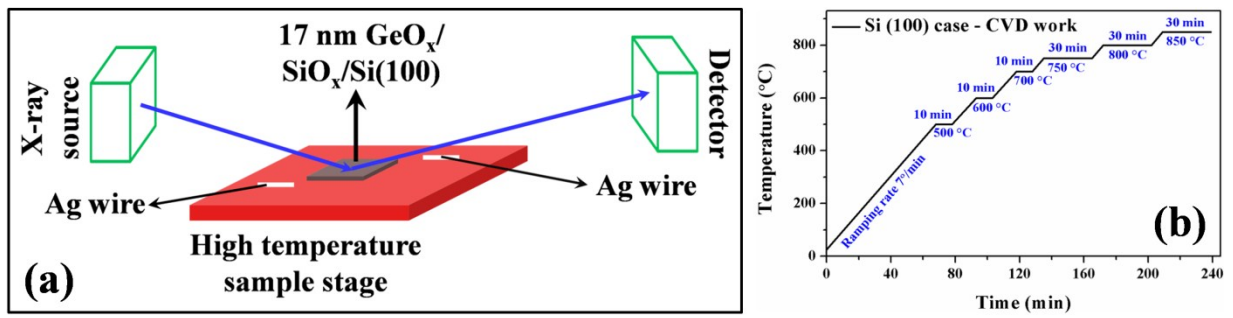

Figure S1: (a) Schematic representation for in-situ annealing and cooling of 17 nm GeO<sub>x</sub>/SiO<sub>x</sub>/Si(100) sample with two silver wires kept close to the sample (*CVD case*). (b) Schematic diagram of the experimental procedure followed during annealing in *CVD case*.

**Figure S2:**

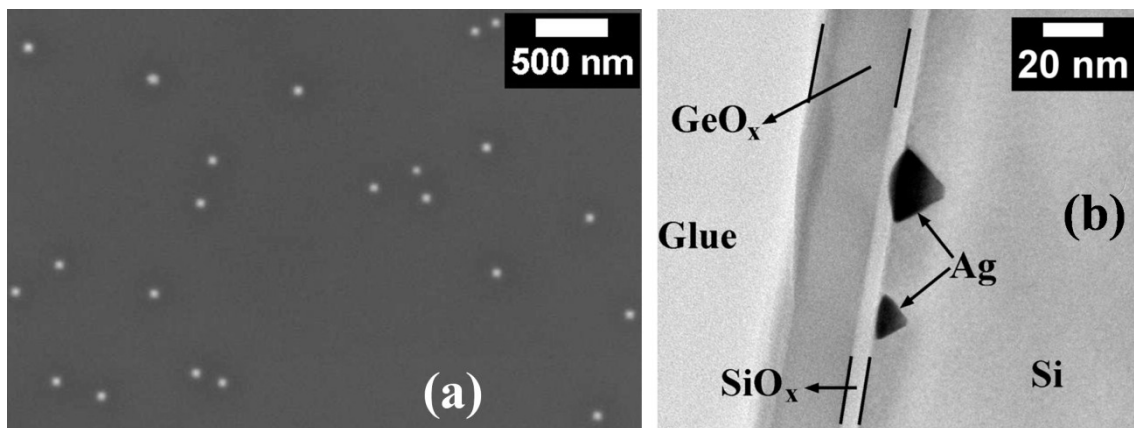

Figure S2: (a) and (b) High magnification SEM image and cross-sectional TEM image of the sample (*CVD case*) after in-situ annealing, confirming the formation of endotaxial silver nanostructures.

Figure S3:

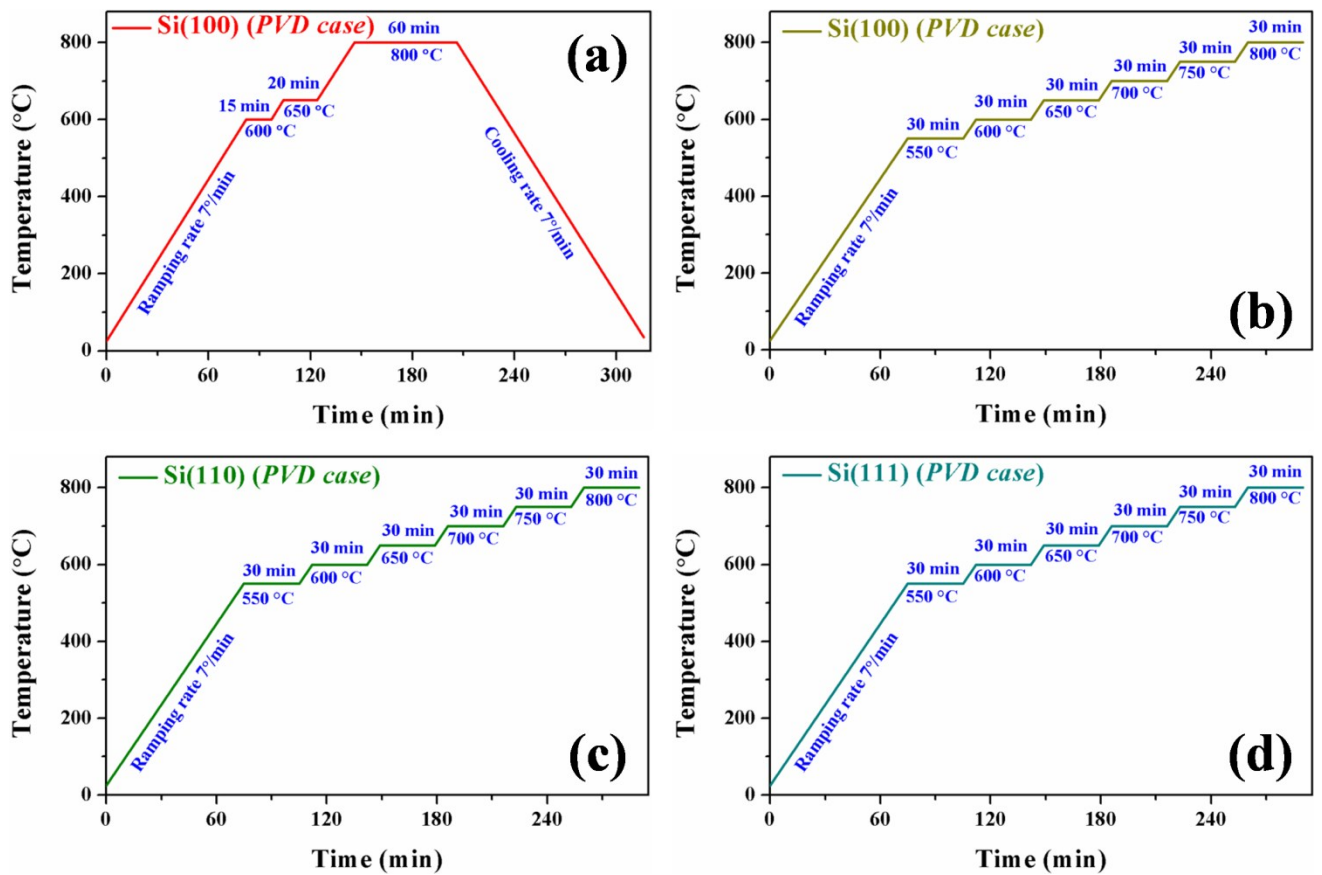

Figure S3: Schematic diagrams of the experimental procedures (a) followed during heating and cooling of 2 nm Ag/17 nm GeO<sub>x</sub>/SiO<sub>x</sub>/Si(100) sample; schematics of experiments followed during in-situ annealing of (b) 2 nm Ag/17 nm GeO<sub>x</sub>/SiO<sub>x</sub>/Si(100), (c) 18 ML Ag/17 nm GeO<sub>x</sub>/SiO<sub>x</sub>/Si(110) and (d) 2 nm Ag/17 nm GeO<sub>x</sub>/SiO<sub>x</sub>/Si(111) samples.

Figure S4:

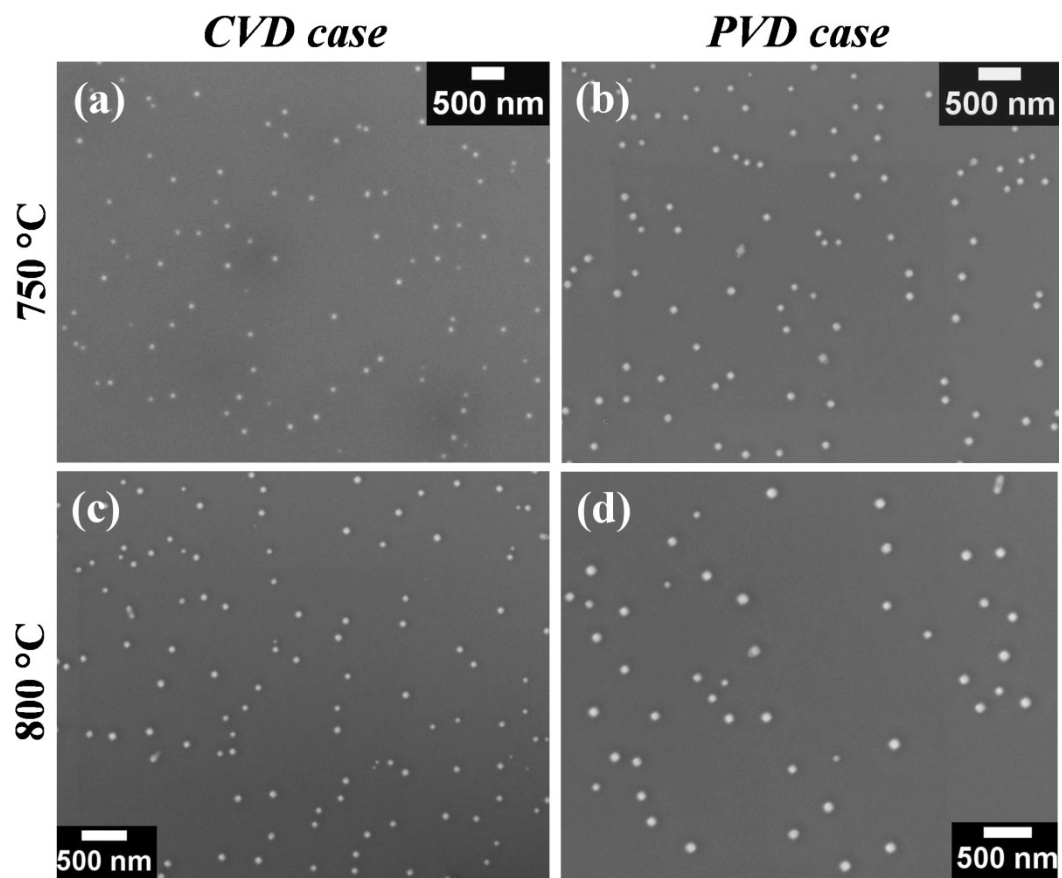

Figure S4: Typical SEM images of endotaxial Ag nanostructures formed at (a) 750 °C and (c) 800 °C (*CVD case*) and (b) 750 °C and (d) 800 °C (*PVD case*).

Figure S5:

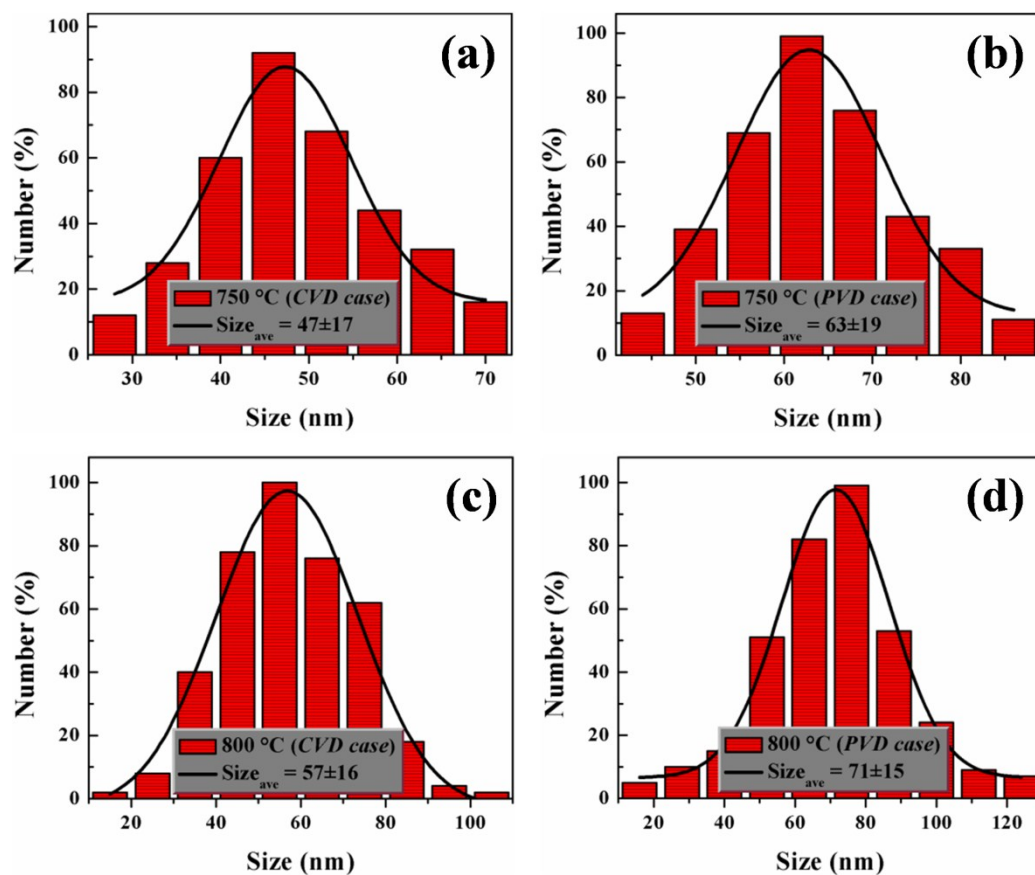

Figure S5: Size distribution of endotaxial Ag nanostructures formed at (a) 750 °C and (c) 800 °C (*CVD case*) and (b) 750 °C and (d) 800 °C (*PVD case*).

**Figure S6:**

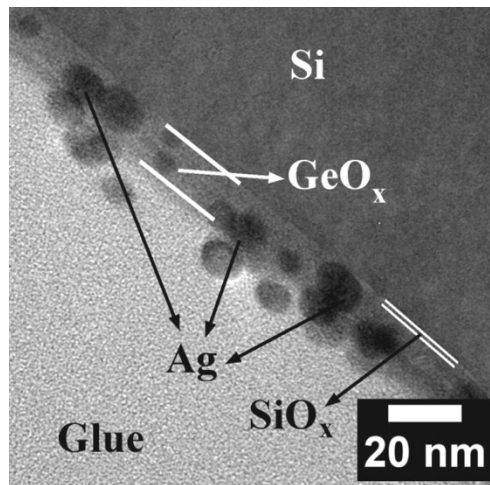

Figure S6: Low magnification cross-sectional TEM image of 2 nm Ag/17 nm GeO<sub>x</sub>/SiO<sub>x</sub>/Si(100) annealed at 600 °C in air for 30 min.
